# Supplementary material
Source: HighWire-hosted journal article supplement (https://bmjopen.bmj.com/content/12/5/e052432)
Supplement: inline-supplementary-material-1 [file inline-supplementary-material-1.pdf]

**Questionnaire (English Version)**

| <b>A. Sociodemographic</b>      |                       |                                                                                                                                                                                     |
|---------------------------------|-----------------------|-------------------------------------------------------------------------------------------------------------------------------------------------------------------------------------|
| 1                               | Gender:               | 1. Male<br>2. Female                                                                                                                                                                |
| 2                               | Age                   | ----- in years                                                                                                                                                                      |
| 3                               | Marital status        | 1. Single<br>2. Married<br>3. Widowed<br>4. Divorced                                                                                                                                |
| 4                               | Educational status    | 1. illiterate<br>2. can read and write<br>3. 1-8 <sup>th</sup> grade<br>4. 9-12 <sup>th</sup> grade<br>5. Technique<br>6. Higher education                                          |
| 5                               | Religion              | 1. Christian<br>2. Muslim<br>3. Other                                                                                                                                               |
|                                 | Occupation            | 1. Merchant<br>2. Gov't employee<br>3. Private employee<br>4. House wife<br>5. Daily laborer<br>6. Police/ Solidier<br>7. Unemployed<br>8. janitor<br>9. student<br>10. Other ----- |
| 6                               | Family monthly income | 1. ≤1650 ETB<br>2. 1651 – 3200 ETB<br>3. 3201 – 5800 ETB<br>4. 5801 – 7800 ETB<br>5. 7801 – 10400 ETB<br>6. >10400 ETB                                                              |
| <b>B. Source of information</b> |                       |                                                                                                                                                                                     |

|                                                          |                                                                |                                                                                                                                                                                                                                                                                                                                                                                                          |
|----------------------------------------------------------|----------------------------------------------------------------|----------------------------------------------------------------------------------------------------------------------------------------------------------------------------------------------------------------------------------------------------------------------------------------------------------------------------------------------------------------------------------------------------------|
|                                                          | <b>What is the source of your information about COVID-19</b>   | <ol style="list-style-type: none"> <li>1. Social media (SNS)</li> <li>2. TV/Radio (New Media)</li> <li>3. Religious leaders</li> <li>4. Friends/ Family/ Neighbors</li> <li>5. Directly from healthcare workers</li> <li>6. Others-----</li> </ol>                                                                                                                                                       |
| <b>C. Knowledge</b> (please tick what is/are applicable) |                                                                |                                                                                                                                                                                                                                                                                                                                                                                                          |
| 1                                                        | <b>Mode of transmission:</b>                                   | <ol style="list-style-type: none"> <li>1. Respiratory droplets</li> <li>2. Airborne</li> <li>3. Fecal-Oral route</li> <li>4. Blood transmission</li> <li>5. Contact with contaminated surfaces</li> <li>6. Contaminated food</li> <li>7. Contact with a COVID-19 positive patient</li> <li>8. Skin contact</li> <li>9. Breast milk</li> <li>10. Vertical transmission</li> </ol>                         |
| 2                                                        | <b>Symptoms</b> (that can be expected from a Covid-19 patient) | <ol style="list-style-type: none"> <li>1. Fever</li> <li>2. Muscle pain</li> <li>3. Fatigue</li> <li>4. Diarrhea</li> <li>5. Sneezing</li> <li>6. Loss of smell</li> <li>7. Vomiting</li> <li>8. Runny nose</li> <li>9. Shortness of Breath</li> <li>10. Cough</li> <li>11. Loss of taste</li> <li>12. Stuffy nose</li> <li>13. Conjunctivitis</li> <li>14. Skin rash</li> <li>15. No symptom</li> </ol> |
| 3                                                        | Are asymptomatic patients capable of transmitting the disease? | <ol style="list-style-type: none"> <li>1. Yes</li> <li>2. No</li> </ol>                                                                                                                                                                                                                                                                                                                                  |

|    |                                                                                                                               |                                                                                                                                                                                                                                             |
|----|-------------------------------------------------------------------------------------------------------------------------------|---------------------------------------------------------------------------------------------------------------------------------------------------------------------------------------------------------------------------------------------|
| 4  | Which group of population has likelihood of developing severe disease? (please tick what is/are applicable)                   | <ol style="list-style-type: none"> <li>1. Elderly</li> <li>2. Pregnant women</li> <li>3. Children</li> <li>4. Smoker</li> <li>5. People with co-morbid (DM, HTN, asthma) conditions</li> <li>6. Obesity</li> <li>7. I don't know</li> </ol> |
| 5  | <b>Prevention methods:</b> Are you aware of that hand washing is one of the primary methods of preventing COVID-19 infection? | <ol style="list-style-type: none"> <li>1. Yes</li> <li>2. No</li> </ol>                                                                                                                                                                     |
| 6  | What is/are the preferable methods of preventing COVID-19 transmission?                                                       | <ol style="list-style-type: none"> <li>1. Hand wash with soap &amp; water</li> <li>2. Hand wash with water only</li> <li>3. Use of hand sanitizers</li> </ol>                                                                               |
| 7  | Duration of handwashing (minimum duration):                                                                                   | <ol style="list-style-type: none"> <li>1. 10 seconds</li> <li>2. 20 seconds</li> <li>3. 30 seconds</li> <li>4. 40 seconds</li> <li>5. I don't know</li> </ol>                                                                               |
| 8  | Do you think use of face masks can prevent COVID-19 transmission?                                                             | <ol style="list-style-type: none"> <li>1. Yes</li> <li>2. No</li> </ol>                                                                                                                                                                     |
| 9  | Do you think double-mask use is effective in prevention?                                                                      | <ol style="list-style-type: none"> <li>1. Yes</li> <li>2. No</li> </ol>                                                                                                                                                                     |
| 10 | What is the recommended minimum distance to maintain adequate social distancing?                                              | <ol style="list-style-type: none"> <li>1. &lt;2 meter</li> <li>2. &gt;2 meter</li> <li>3. I don't know</li> </ol>                                                                                                                           |
| 11 | In order to prevent spread, do you think individuals should avoid going to crowded places and taking public transportation?   | <ol style="list-style-type: none"> <li>1. Yes</li> <li>2. No</li> </ol>                                                                                                                                                                     |
| 12 | Do you think you should stop to maintain social distancing if you are wearing a mask?                                         | <ol style="list-style-type: none"> <li>1. Yes</li> <li>2. No</li> </ol>                                                                                                                                                                     |
| 13 | Do you think you should avoid shaking hands and hugging while greeting people?                                                | <ol style="list-style-type: none"> <li>1. Yes</li> <li>2. No</li> </ol>                                                                                                                                                                     |

|    |                                                                                                   |                 |
|----|---------------------------------------------------------------------------------------------------|-----------------|
| 14 | Provided that your family member is COVID-19 positive, would you put yourself in self-quarantine? | 1. Yes<br>2. No |
| 15 | How long should people in contact with COVID-19 positive put into self-quarantine?                | ( )             |

**D. Attitude**

|    |                                                                                   |                 |
|----|-----------------------------------------------------------------------------------|-----------------|
| 1  | Do you agree that COVID-19 will be successfully controlled?                       | 1. Yes<br>2. No |
| 2  | I have no concern of being infected with COVID-19                                 | 1. Yes<br>2. No |
| 3  | Do you have confidence that Ethiopia will win the battle against COVID-19?        | 1. Yes<br>2. No |
| 4  | Is the Ethiopian government handling the COVID-19 health crisis well?             | 1. Yes<br>2. No |
| 5  | Do you think that wearing a face mask will effectively prevent COVID-19?          | 1. Yes<br>2. No |
| 6  | Do you think that adequate social distancing will effectively prevent COVID-19?   | 1. Yes<br>2. No |
| 7  | Do you think washing hands with soap and water helps to prevent COVID-19?         | 1. Yes<br>2. No |
| 8  | Would you be willing to tell people if you were having COVID-19 symptoms?         | 1. Yes<br>2. No |
| 9  | Would you inform the health authorities if a family member exhibits the symptoms? | 1. Yes<br>2. No |
| 10 | Do you think traditional medicine can prevent or treat COVID-19?                  | 1. Yes<br>2. No |
| 11 | Do you think COVID-19 doesn't affect youngsters?                                  | 1. Yes<br>2. No |

| <b>E. Practice</b> |                                                                 |                                                                                                                                                                       |
|--------------------|-----------------------------------------------------------------|-----------------------------------------------------------------------------------------------------------------------------------------------------------------------|
| 1                  | In recent days have you worn a mask leaving home?               | <ol style="list-style-type: none"> <li>1. Always</li> <li>2. Sometimes</li> <li>3. Never</li> </ol>                                                                   |
| 2                  | Do you wash your hands before putting your mask on?             | <ol style="list-style-type: none"> <li>1. Yes</li> <li>2. No</li> </ol>                                                                                               |
| 3                  | What kind of mask do you use?                                   | <ol style="list-style-type: none"> <li>1. surgical</li> <li>2. N-95</li> <li>3. cloth</li> </ol>                                                                      |
| 4                  | If cloth, how often do you wash and reuse it?                   | <ol style="list-style-type: none"> <li>1. Everyday</li> <li>2. Weekly</li> <li>3. monthly</li> </ol>                                                                  |
| 5                  | -If surgical mask, how often do you change?                     | <ol style="list-style-type: none"> <li>1. Everyday</li> <li>2. Weekly</li> <li>3. monthly</li> </ol>                                                                  |
| 6                  | If you reuse a mask, where/ how do you store it?                | <ol style="list-style-type: none"> <li>1. In the pocket</li> <li>2. plastic bag</li> <li>3. Holding on hands</li> </ol>                                               |
| 7                  | Do you touch your face while wearing a mask?                    | <ol style="list-style-type: none"> <li>1. Always</li> <li>2. Sometimes</li> <li>3. Never</li> </ol>                                                                   |
| 8                  | Do you avoid touching your mask?                                | <ol style="list-style-type: none"> <li>1. Yes</li> <li>2. No</li> </ol>                                                                                               |
| 9                  | How do you take off your mask?                                  | <ol style="list-style-type: none"> <li>1. from the front of mask</li> <li>2. from the string of mask</li> </ol>                                                       |
| 10                 | How do you greet your friends?                                  | <ol style="list-style-type: none"> <li>1. hand shake</li> <li>2. hugging</li> <li>3. elbow touching</li> <li>4. waving hand/without contact</li> </ol>                |
| 11                 | In recent days have you practiced maintain your distance at 2m? | <ol style="list-style-type: none"> <li>1. Yes</li> <li>2. No</li> </ol>                                                                                               |
| 12                 | When do you wash your hands?                                    | <ol style="list-style-type: none"> <li>1. After I touch dirty materials such as Birr, door handles</li> <li>2. After I touch my nose or ears or skin parts</li> </ol> |

|  |  |                                                                                                                                                                                                                   |
|--|--|-------------------------------------------------------------------------------------------------------------------------------------------------------------------------------------------------------------------|
|  |  | <ol style="list-style-type: none"> <li>3. Before putting on a mask and after taking off a mask</li> <li>4. After coughing and sneezing into hands</li> <li>5. When entering and leaving a public place</li> </ol> |
|--|--|-------------------------------------------------------------------------------------------------------------------------------------------------------------------------------------------------------------------|

| <b>F. Vaccine</b> |                                                        |                                                                                                                                                                                                                                                                                                                                                                                                                                                                                                                                                                                                                                                                                                    |
|-------------------|--------------------------------------------------------|----------------------------------------------------------------------------------------------------------------------------------------------------------------------------------------------------------------------------------------------------------------------------------------------------------------------------------------------------------------------------------------------------------------------------------------------------------------------------------------------------------------------------------------------------------------------------------------------------------------------------------------------------------------------------------------------------|
| 1                 | Have you heard about any prospective COVID-19 vaccine? | <ol style="list-style-type: none"> <li>1. Yes</li> <li>2. No</li> </ol>                                                                                                                                                                                                                                                                                                                                                                                                                                                                                                                                                                                                                            |
| 2                 | If yes, where did you get the information from?        | <ol style="list-style-type: none"> <li>1. Internet/social media</li> <li>2. Mass media (Television, radio)</li> <li>3. Newspapers</li> <li>4. Other sources</li> </ol> If other sources, specify (                      )                                                                                                                                                                                                                                                                                                                                                                                                                                                                          |
| 3                 | Will you get vaccinated, if possible?                  | <ol style="list-style-type: none"> <li>1. Yes</li> <li>2. No</li> <li>3. Not sure</li> </ol>                                                                                                                                                                                                                                                                                                                                                                                                                                                                                                                                                                                                       |
| 4                 | If no, why?                                            | <ol style="list-style-type: none"> <li>1. The vaccine itself might cause the infection</li> <li>2. I'm worried about the side effects</li> <li>3. I believe it will be used as a biological weapon to serve those who produce vaccine</li> <li>4. I don't find it reliable as it took a short time to get developed</li> <li>5. I don't think the vaccines produced will be effective</li> <li>6. I don't think I have enough information about the vaccines</li> <li>7. I believe COVID-19 is exaggerated, it is not a risky disease, so no vaccine is needed</li> <li>8. I prefer other ways of protection</li> <li>9. In general, I have doubts about the vaccine</li> <li>10. Other</li> </ol> |
| 5                 | Should children be vaccinated too?                     | <ol style="list-style-type: none"> <li>1. Yes</li> <li>2. No</li> </ol>                                                                                                                                                                                                                                                                                                                                                                                                                                                                                                                                                                                                                            |

|   |                                   |  |
|---|-----------------------------------|--|
| 6 | If the answer is no, explain why? |  |
|---|-----------------------------------|--|

### Questions for the in-depth interview

1. How do you know about COVID-19? (Probe: transmission mechanisms, prevention strategies, vaccines availability, perceptions towards the vaccines)
2. What were your initial reactions towards COVID-19 when you first heard about it? How about now?
3. What are your thoughts on the COVID-19 vaccine? (Probe: availability, efficacy, perceptions on quality, side effects)
4. What factors do you think will hinder people from receiving COVID-19 vaccines?
